# Supplementary material for: Stereodifferentiation in the formation and decay of the encounter complex in bimolecular electron transfer with photoactivated acceptors
Source: Royal Society of Chemistry journal article supplement (doi:10.1039/b500697j), 2005-01-01
Supplement: b500697j.pdf [file b500697j.pdf]

**Stereodifferentiation in the formation and decay of the encounter complex  
in bimolecular electron transfer with photoactivated acceptors**

Julia Pérez-Prieto,\* Raquel E. Galian, Maria C. Morant-Miñana, Miguel  
A. Miranda\*

*Departamento de Química Orgánica/ICMOL, Universidad de Valencia, Av. Vicent  
Andrés Estellés s/n, 46100 Burjassot, Valencia.*

*Departamento de Química/Instituto de Tecnología Química UPV-CSIC; Universidad  
Politécnica de Valencia, Camino de Vera s/n, 46071 Valencia.*

**Supporting Information**

**S2:** Transient absorption spectra of **(R)-1** in deaerated acetonitrile. Transient absorption spectra of **(R)-1** in deaerated dichloromethane.

**S3:** Transient absorption spectra in deaerated acetonitrile of **(R)-1** in the presence of **(R)-2**. Transient absorption spectra in deaerated acetonitrile of **(R)-1** in the presence of **(R)-3**.

**S4:** Transient absorption spectra in deaerated dichloromethane of **(R)-1** in the presence of **(R)-2**. Transient absorption spectra in deaerated dichloromethane of **(R)-1** in the presence of **(R)-3**.

**S5-S12:** Plots of the observed rate constant for the decay of **(R)-1** or **(S)-1** versus [**(R)-2** or **(R)-3**] either in acetonitrile or dichloromethane, their double-reciprocal evaluation according to equation 5 and comparison between the experimental values and the calculated line for several non-linear quenching plot based on the  $K_{EC}$  and  $k_d$  values recovered from the double-reciprocal plot.

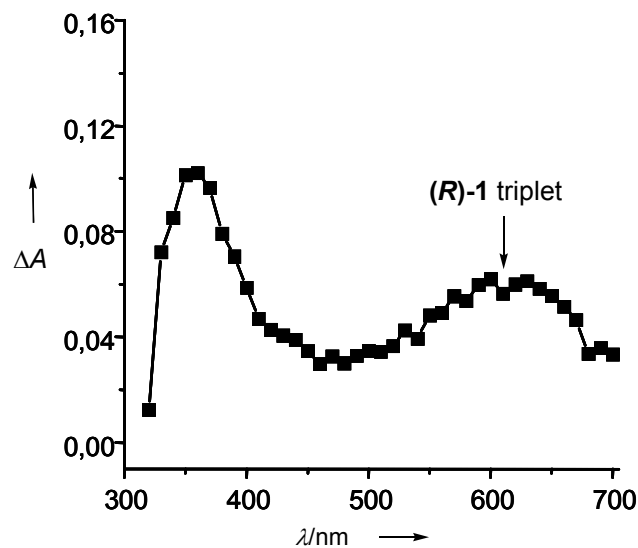

**Figure S1:** Transient absorption spectra of a deaerated acetonitrile solution of (*R*)-1 (1.1 mM) obtained 0.2  $\mu\text{s}$  after the laser pulse.

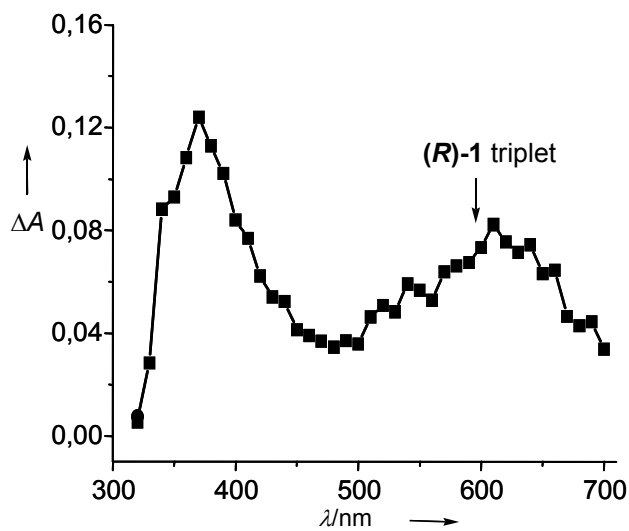

**Figure S2:** Transient absorption spectra of a deaerated dichloromethane solution of (*R*)-1 (1.1 mM) obtained 0.2  $\mu\text{s}$  after the laser pulse.

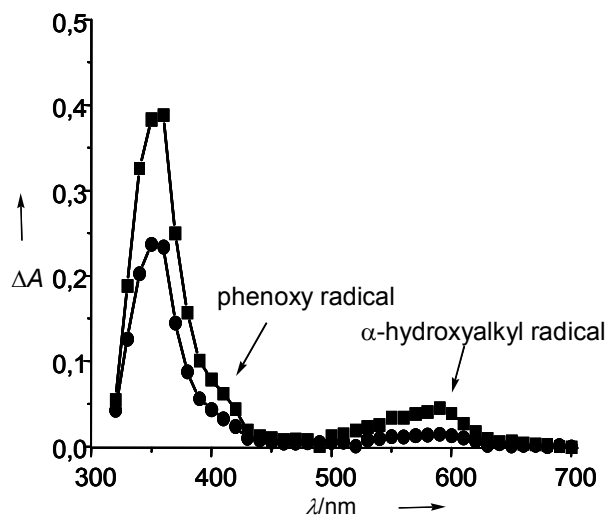

**Figure S3:** Transient absorption spectra of a deaerated acetonitrile solution of (R)-1 (1.1 mM) in the presence of (R)-2 (80 mM) obtained 0.2 and 10  $\mu\text{s}$  after the laser pulse.

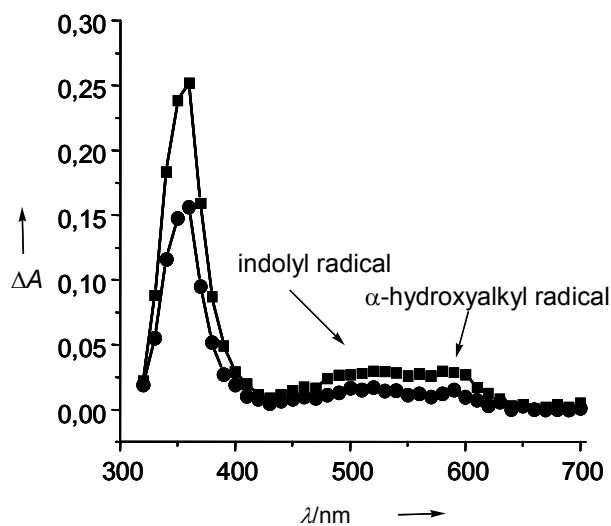

**Figure S4:** Transient absorption spectra of a deaerated acetonitrile solution of (R)-1 (1.1 mM) in the presence of (R)-3 (11 mM) obtained 0.2 and 10  $\mu\text{s}$  after the laser pulse.

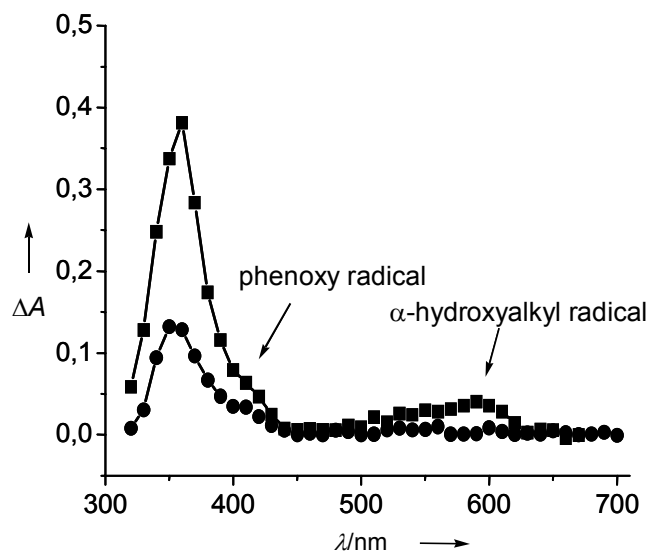

**Figure S5:** Transient absorption spectra of a deaerated dichloromethane solution of (R)-1 (1.1 mM) in the presence of (R)-2 (12 mM) obtained 0.2 and 10  $\mu\text{s}$  after the laser pulse.

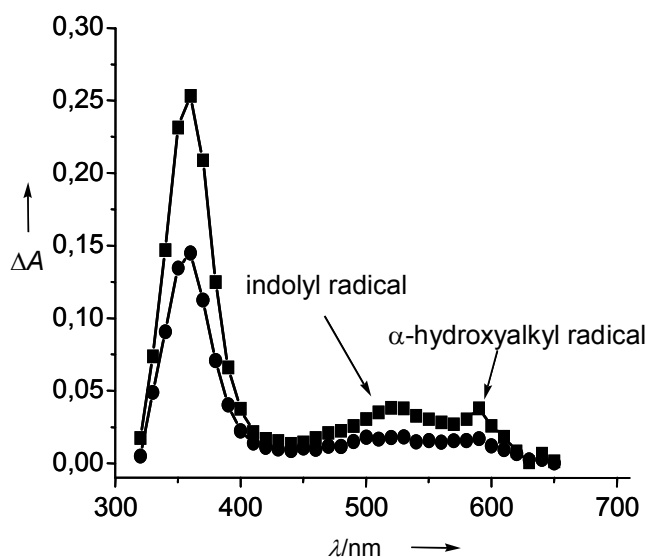

**Figure S6:** Transient absorption spectra of a deaerated dichloromethane solution of (R)-1 (1.1 mM) in the presence of (R)-3 (11 mM) obtained 0.2 and 10  $\mu\text{s}$  after the laser pulse.

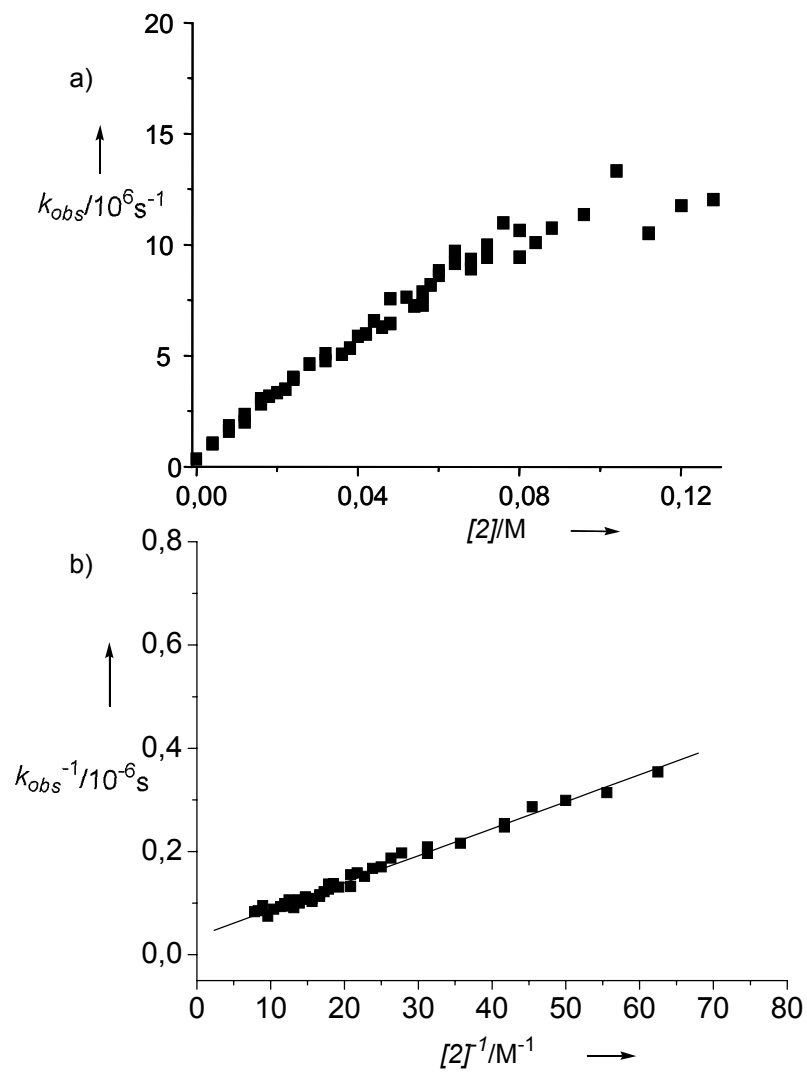

**Figure S7:** a) Saturation behavior of the observed rate constants for the quenching of (*R*)-1 triplet excited state at 630 nm by (*R*)-2 in acetonitrile. b) Double-reciprocal evaluation according to equation 5.

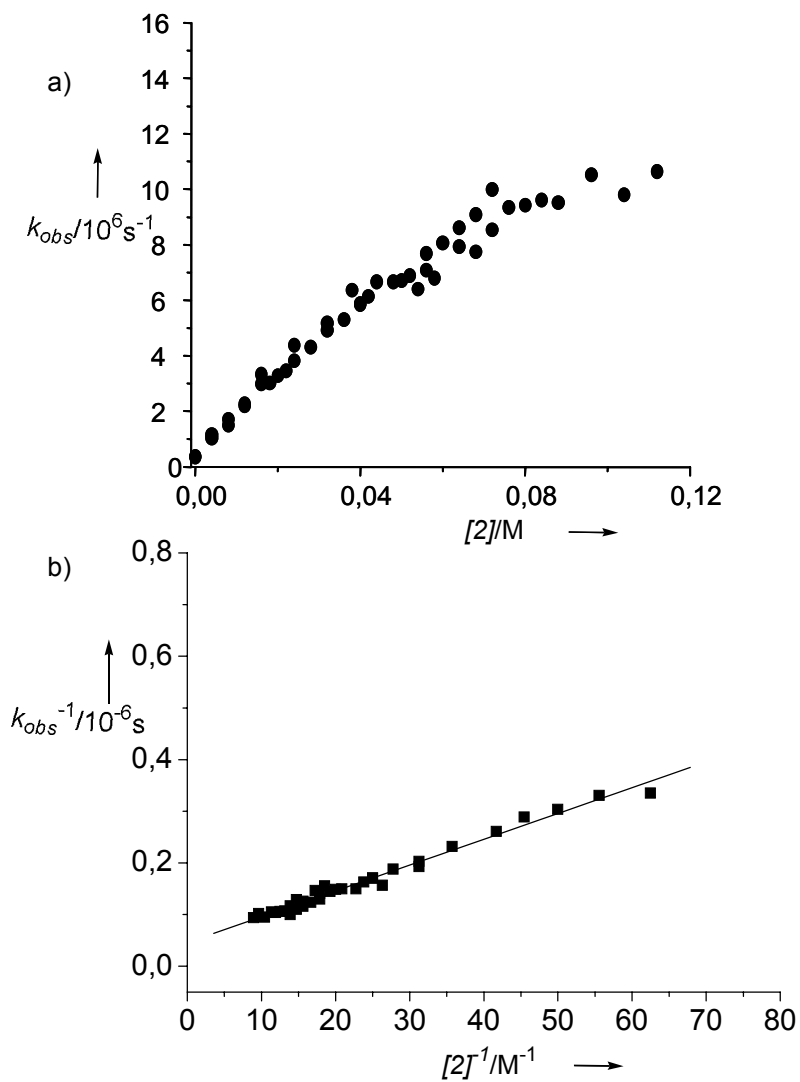

**Figure S8:** a) Saturation behavior of the observed rate constants for the quenching of **(S)-1** triplet excited state by **(R)-2** in acetonitrile. b) Double-reciprocal evaluation according to equation 5.

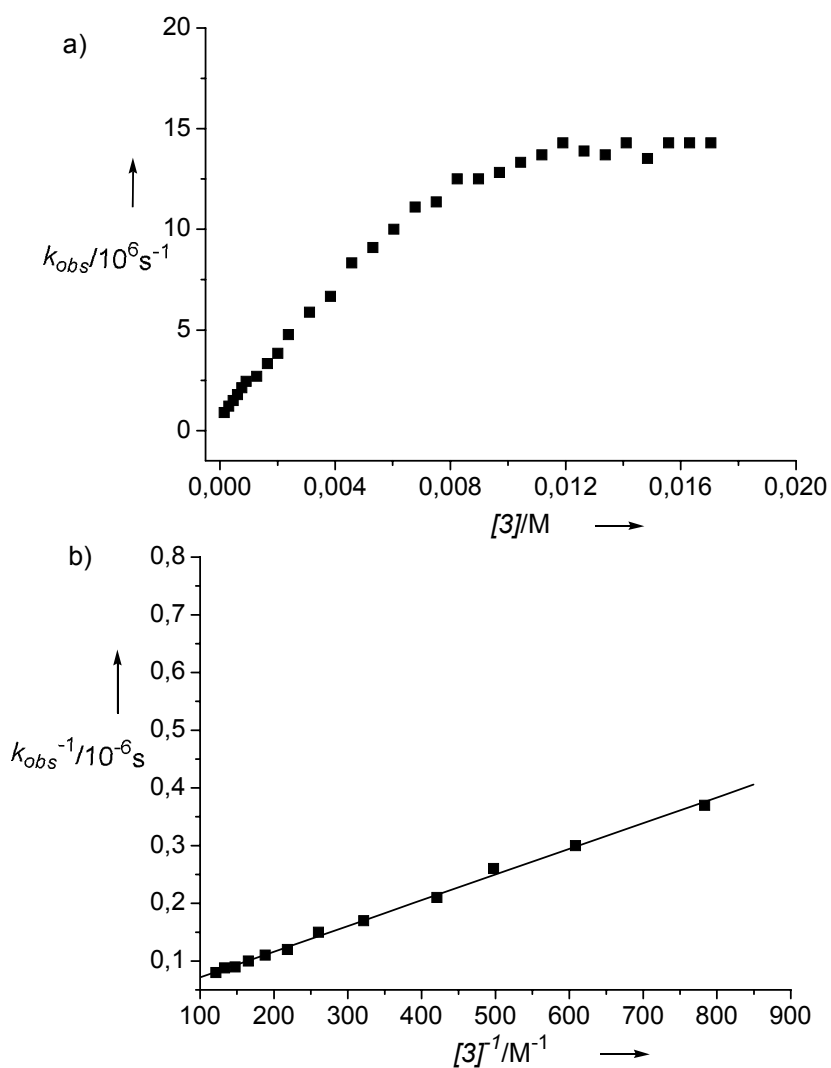

**Figure S9:** a) Saturation behavior of the observed rate constants for the quenching of (**R**)-1 triplet excited state at 630 nm by (**R**)-3 in acetonitrile. b) Double-reciprocal evaluation according to equation 5.

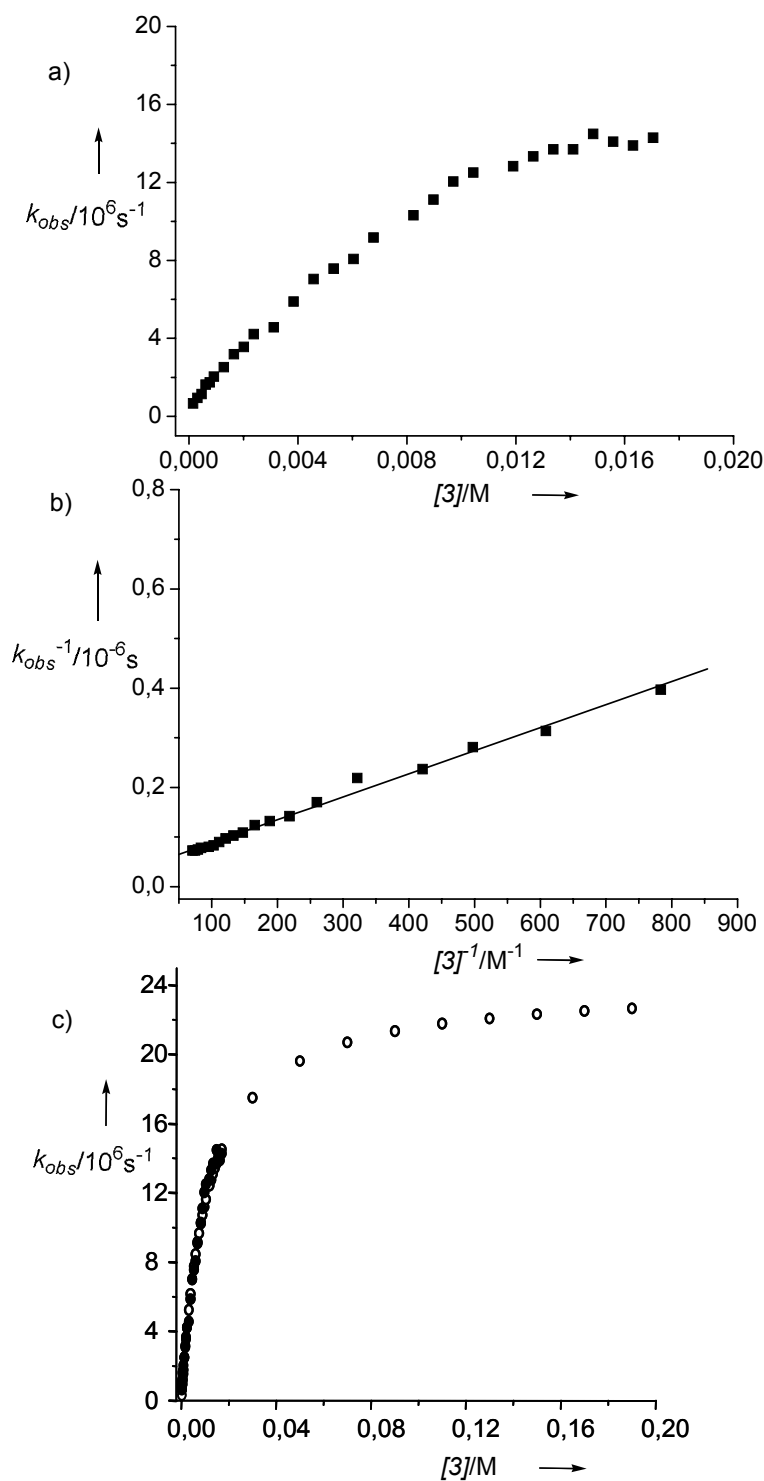

**Figure S10:** a) Saturation behavior of the observed rate constants for the quenching of (S)-1 triplet excited state at 630 nm by (R)-3 in acetonitrile. b) Double-reciprocal evaluation according to equation 5. c) Comparison between the experimental values ( $\bullet$ ) and the calculated line ( $\circ$ ) for the non-linear quenching plot based on the  $K_{EC}$  and  $k_d$  values recovered from the double-reciprocal plot.



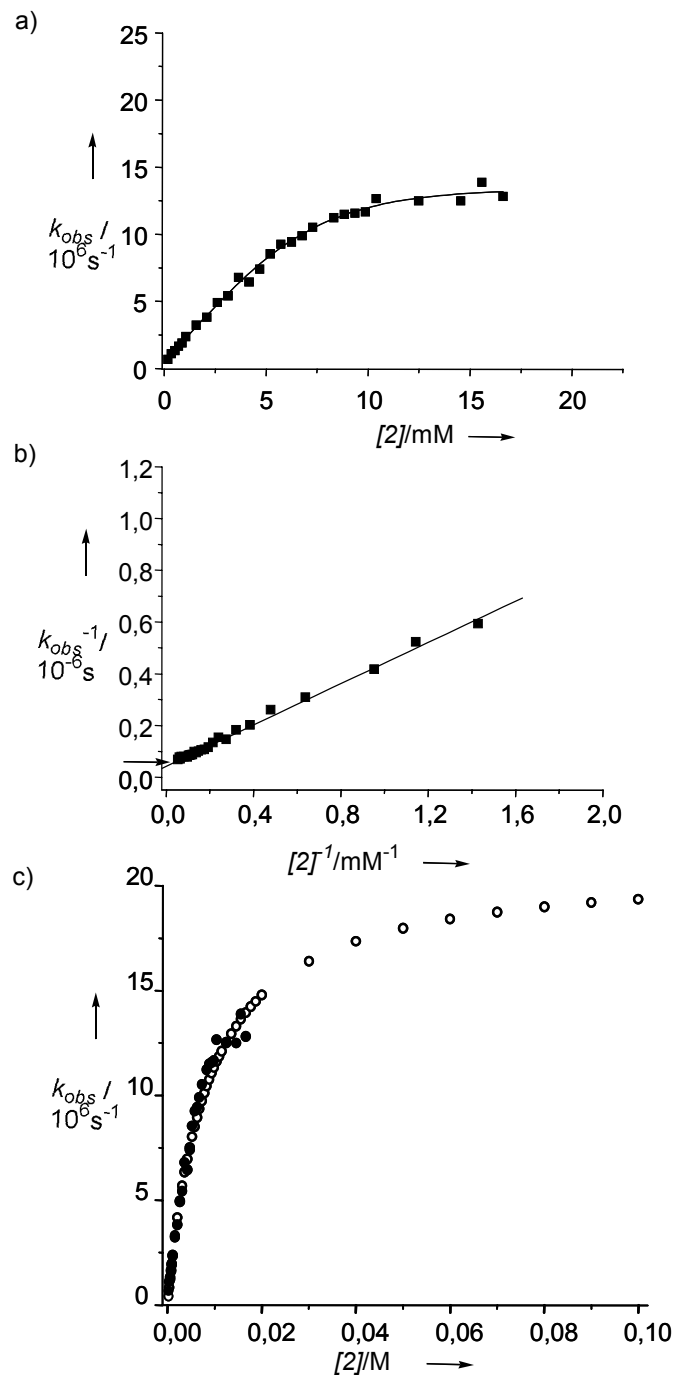

**Figure S11:** a) Saturation behavior of the observed rate constants for the quenching of (R)-1 triplet excited state at 630 nm by (R)-2 in dichloromethane. b) Double-reciprocal evaluation according to equation 5. c) Comparison between the experimental values (●) and the calculated line (○) for the non-linear quenching plot based on the  $K_{EC}$  and  $k_d$  values recovered from the double-reciprocal plot.

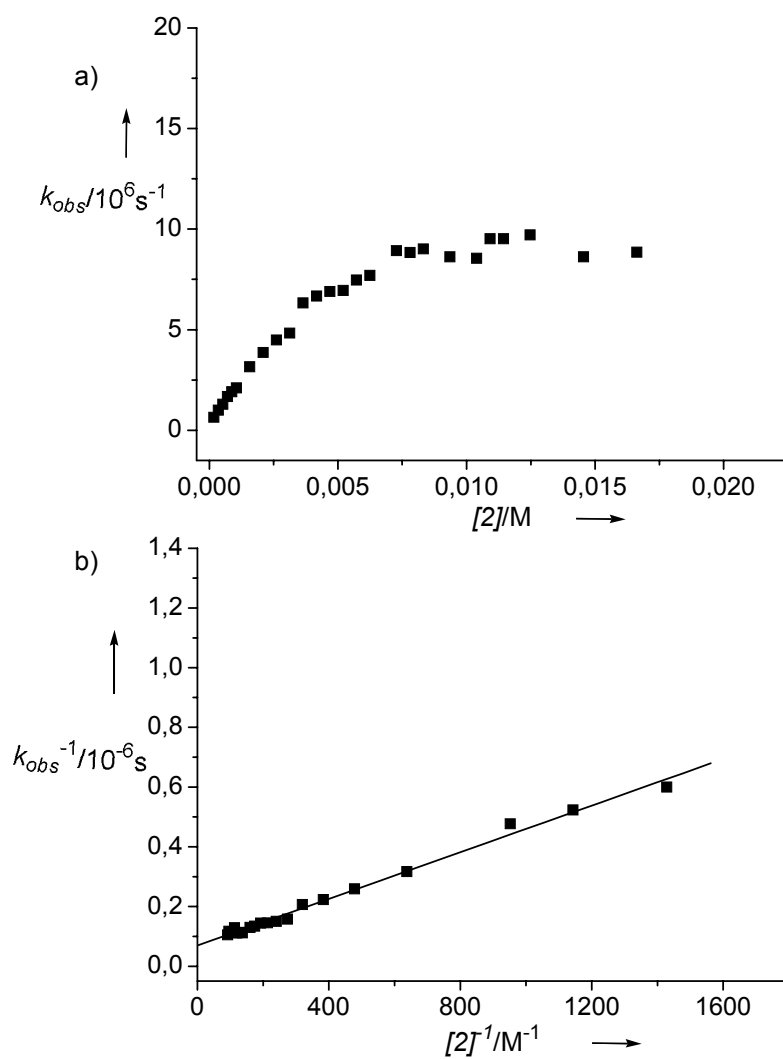

**Figure S12:** a) Saturation behavior of the observed rate constants for the quenching of (**S**)-**1** triplet excited state at 630 nm by (**R**)-**2** in dichloromethane. b) Double-reciprocal evaluation according to equation 5.

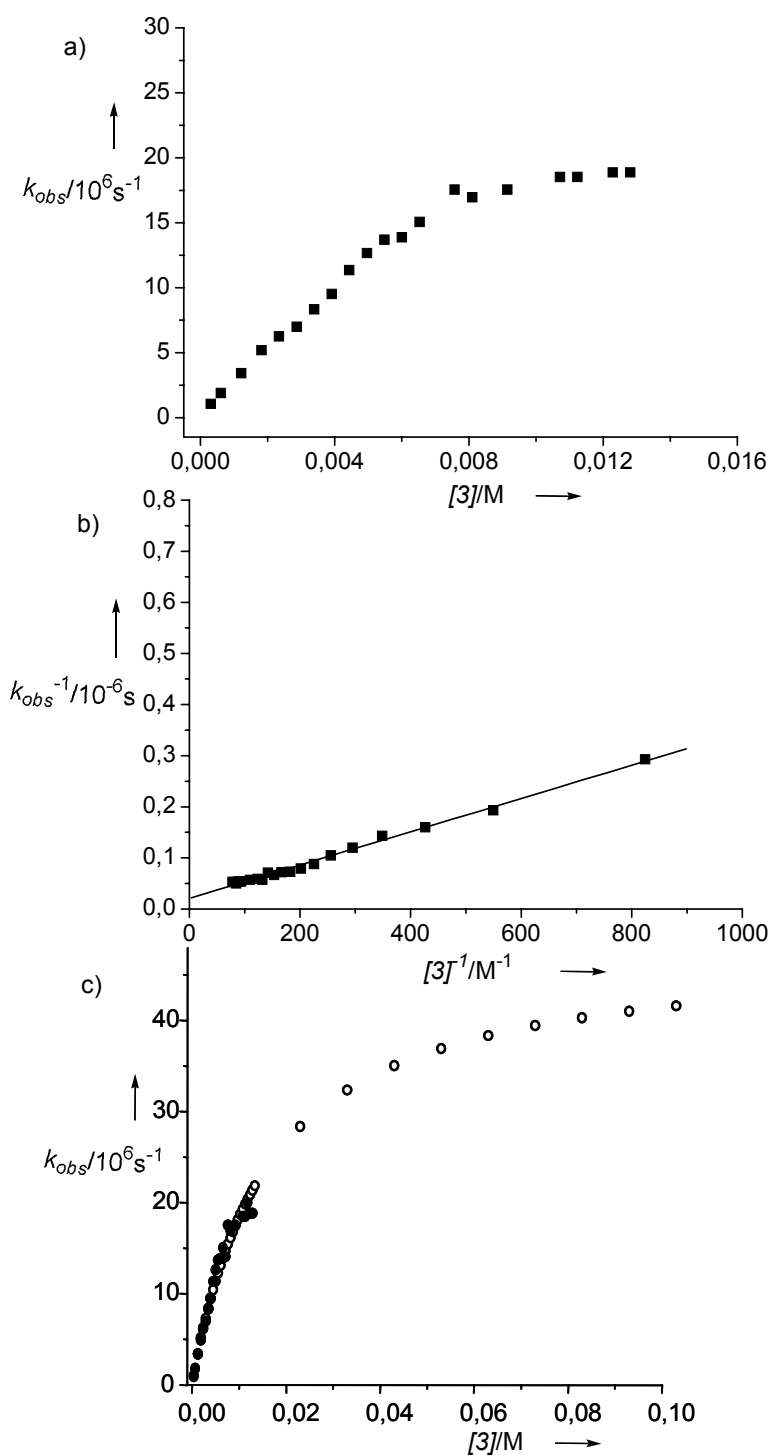

**Figure S13:** a) Saturation behavior of the observed rate constants for the quenching of (*R*)-1 triplet excited state at 630 nm by (*R*)-3 in dichloromethane. b) Double-reciprocal evaluation according to equation 5. c) Comparison between the experimental values (●) and the calculated line (○) for the non-linear quenching plot based on the  $K_{EC}$  and  $k_d$  values recovered from the double-reciprocal plot.

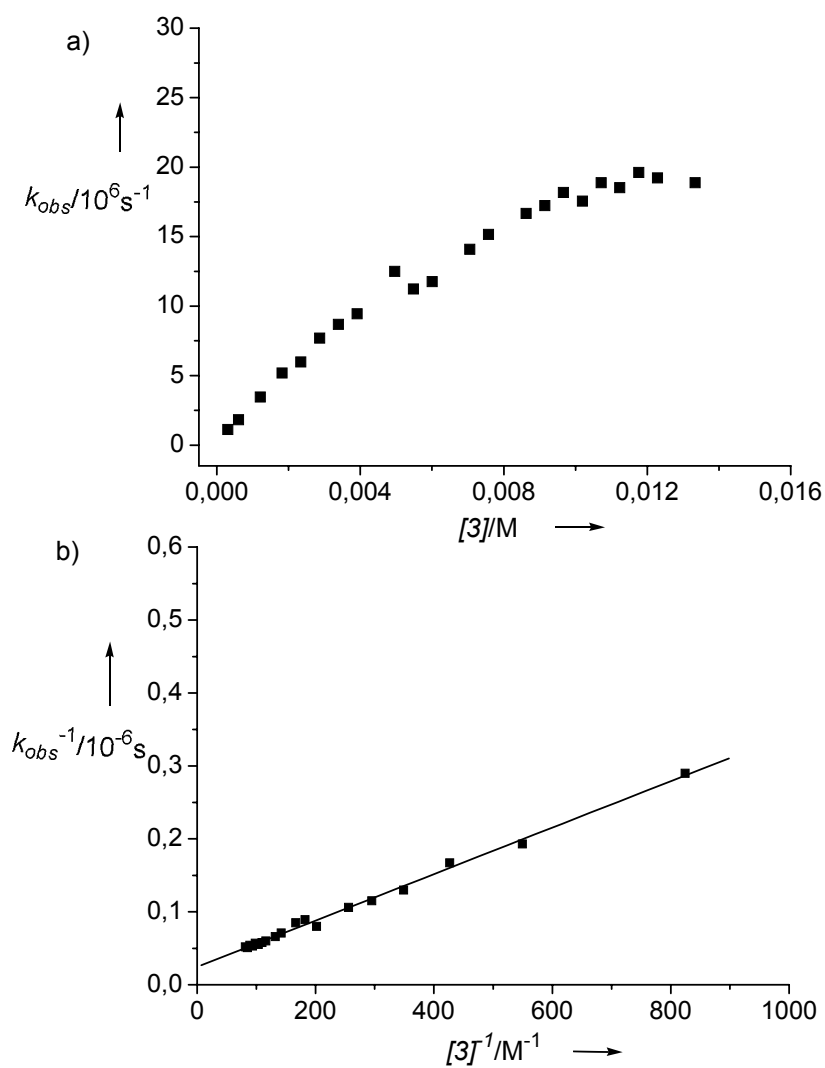

**Figure S14:** a) Saturation behavior of the observed rate constants for the quenching of (**S**)-**1** triplet excited state at 630 nm by (**R**)-**3** in dichloromethane. b) Double-reciprocal evaluation according to equation 5.
